# Supplementary material for: Combined Vorinostat and Chloroquine Inhibit Sodium Iodide Symporter Endocytosis and Enhance Radionuclide Uptake In Vivo
Source: PubMed Central journal article supplement (PMC7615786; doi:10.1158/1078-0432.ccr-23-2043), 2024-04-01
Supplement: EMS190879-supplement-Supplementary_Figure_S1.pdf [file EMS190879-supplement-Supplementary_Figure_S1.pdf]

# SUPPLEMENTARY FIGURE S1

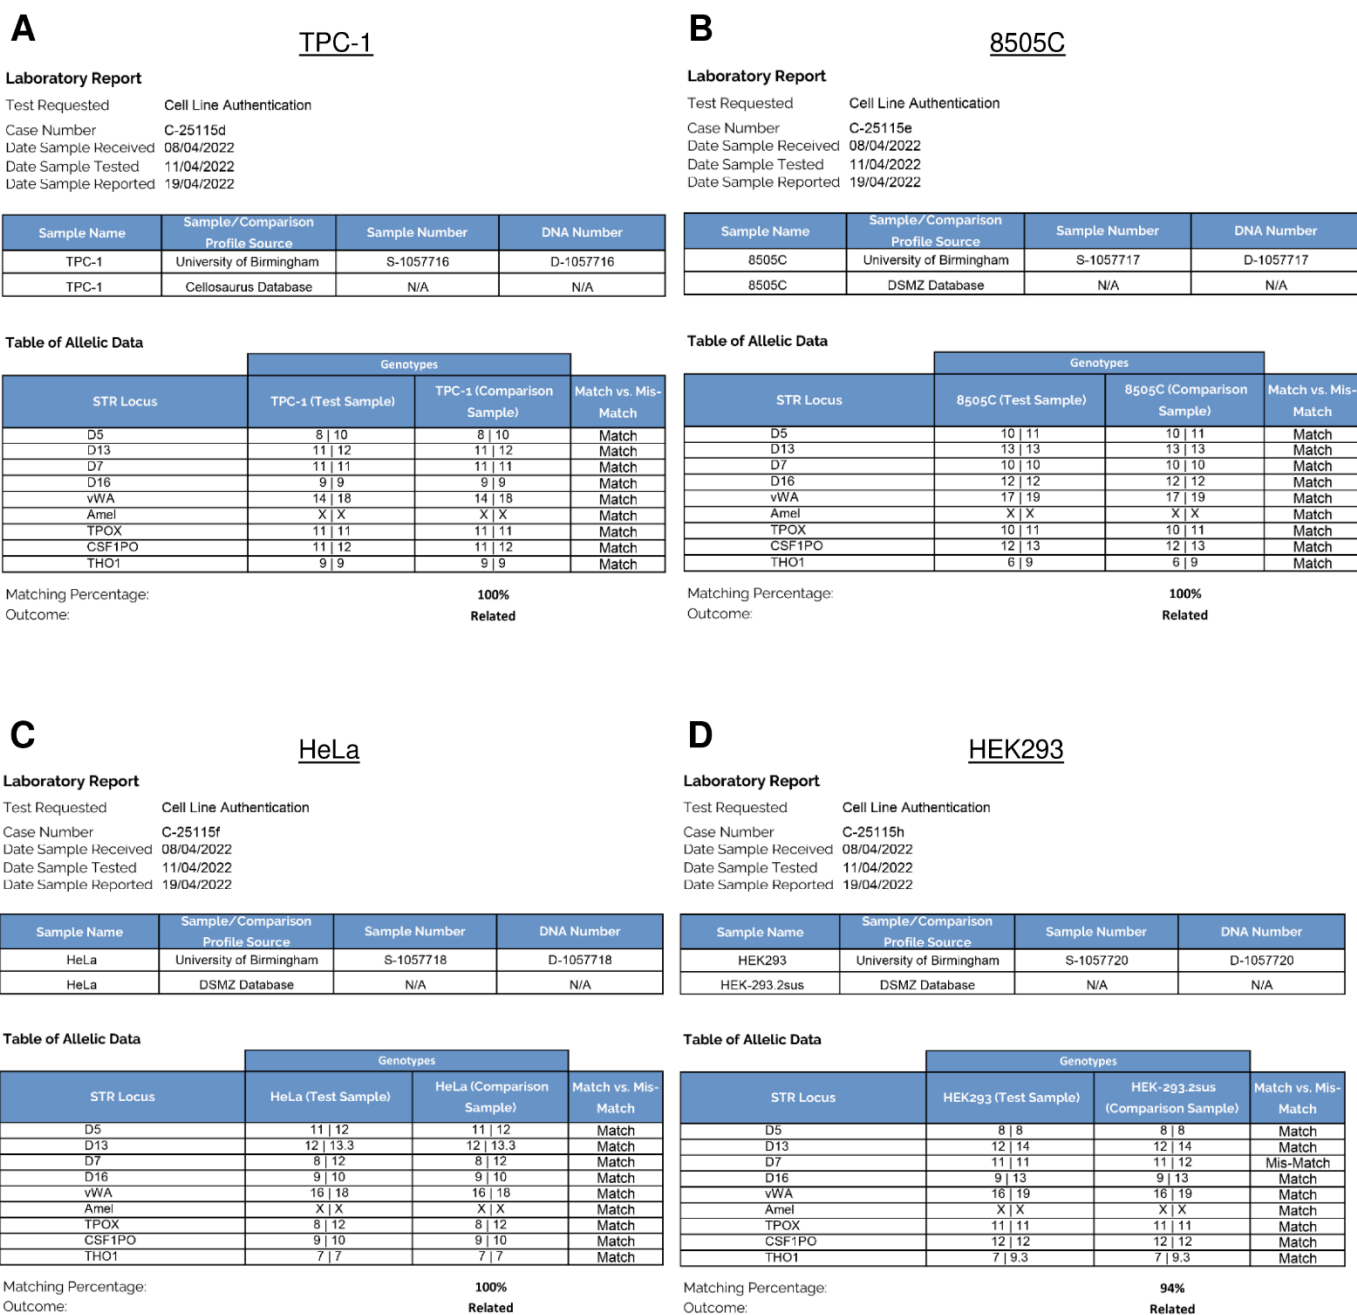

**Figure S1.** Representative STR profiles of cell lines. Examples of cell line authentication reports for **A**, TPC-1, **B**, 8505C, **C**, HeLa and **D**, HEK293 cells generated by NorthGene (Biofortuna). DNA profiles were compared to profiles located on either the Cellosaurus or DSMZ database as indicated. Analysis was conducted using 8 loci allowing identical matches and approximate power of discrimination of 1 in 1,000,000,000. Cell lines were considered to be related with a matching percentage > 80%.
