# Supplementary material for: Combined Vorinostat and Chloroquine Inhibit Sodium Iodide Symporter Endocytosis and Enhance Radionuclide Uptake In Vivo
Source: PubMed Central journal article supplement (PMC7615786; doi:10.1158/1078-0432.ccr-23-2043), 2024-04-01
Supplement: EMS190879-supplement-Supplementary_Figure_S2.pdf [file EMS190879-supplement-Supplementary_Figure_S2.pdf]

# SUPPLEMENTARY FIGURE S2

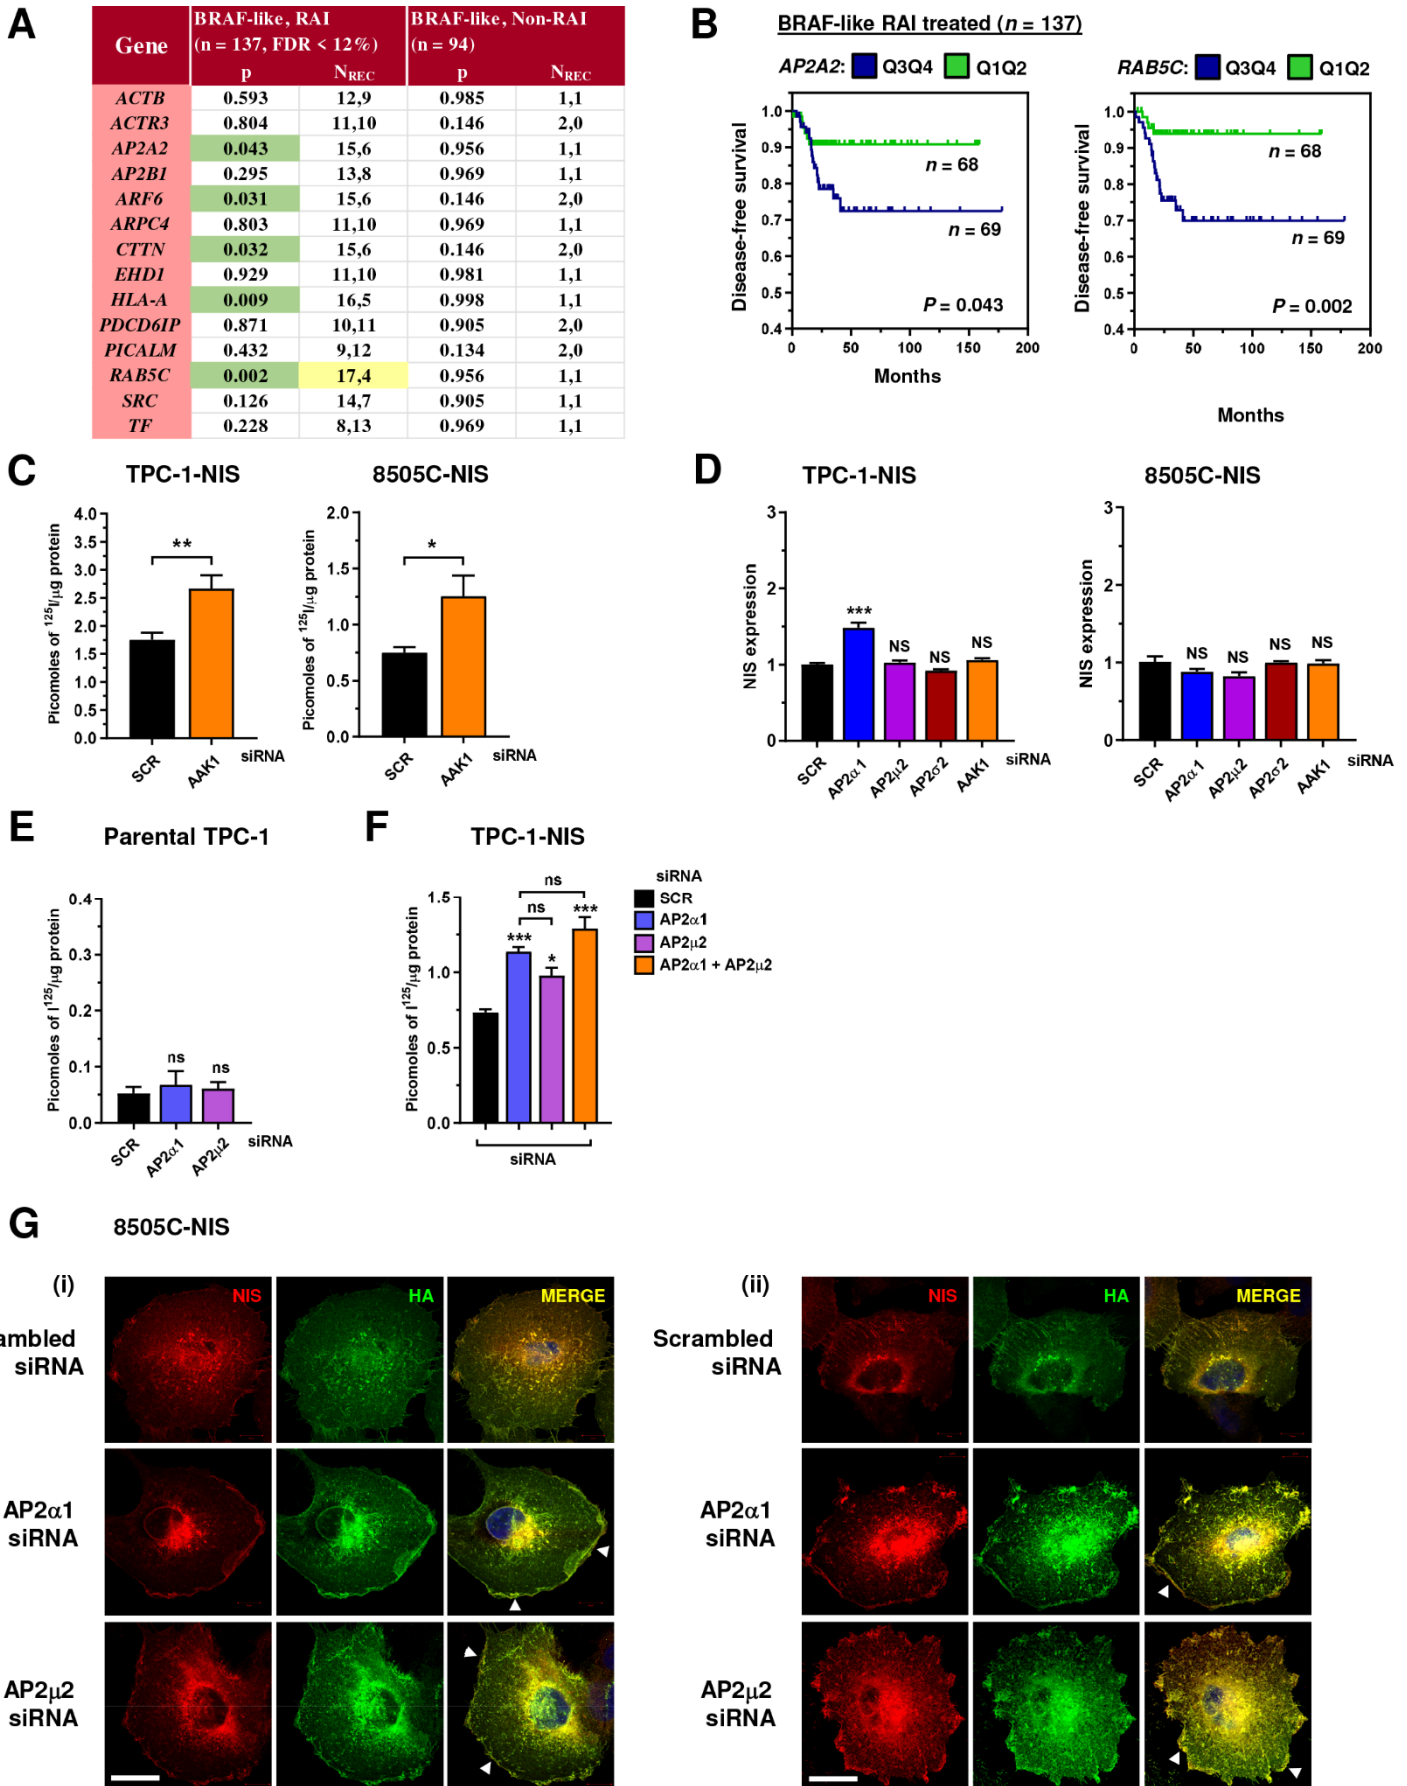

## H TPC-1-NIS

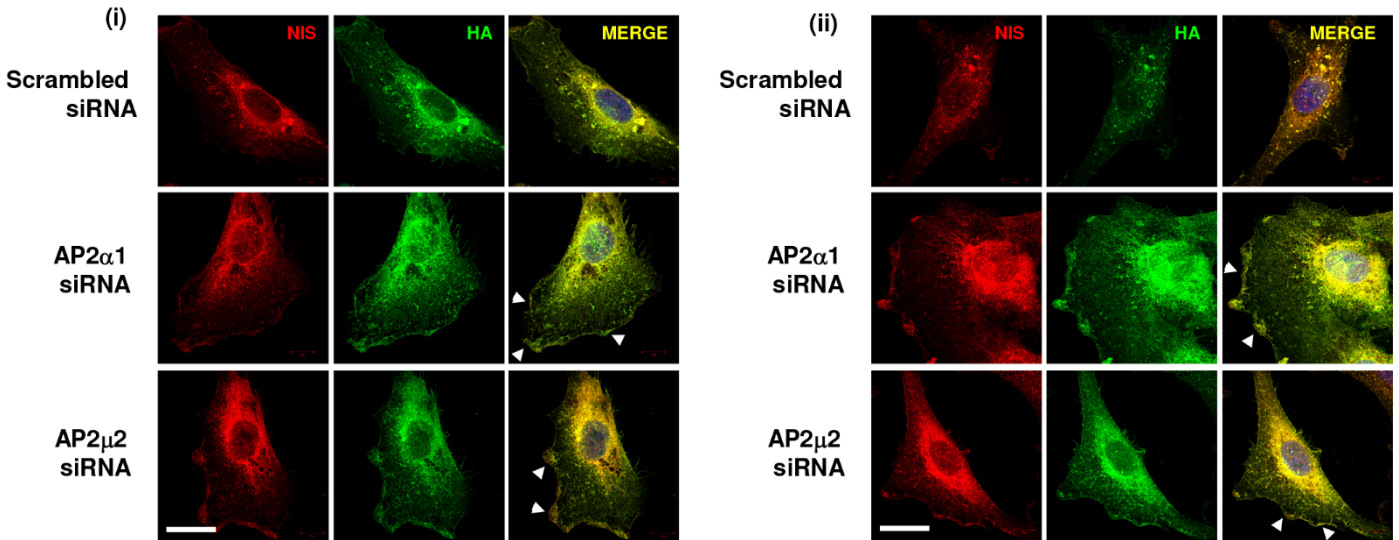

## I NanoBiT: NIS:PBF interaction

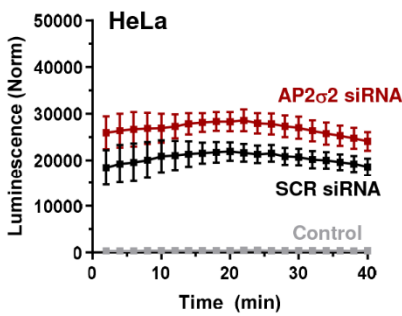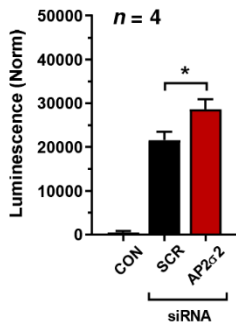

## J NanoBiT: NIS:PBF interaction

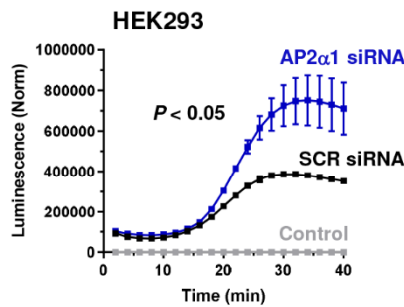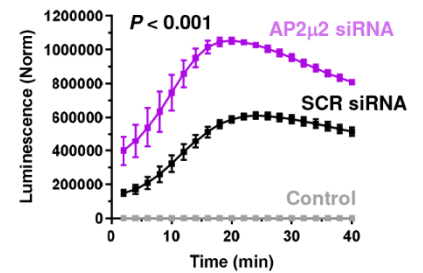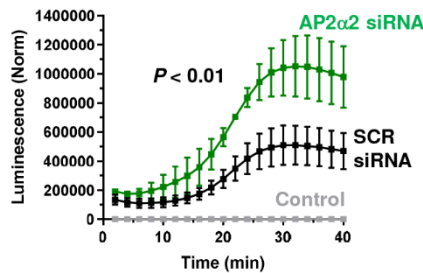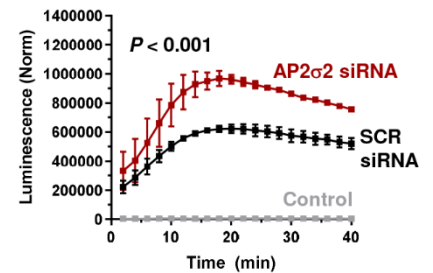

**Figure S2.** Association of NIS interactors with recurrence. **A**, Kaplan-Meier analysis of RAI-treated ( $n = 137$ ) and non-RAI treated ( $n = 94$ ) THCA cohorts stratified on high (Q3Q4) vs low (Q1Q2) tumoral expression; log-rank test.  $P$ -values shown with FDR < 12%.  $N_{REC}$  = recurrent cases in cohort with high (left) or low (right) tumoral expression. Green =  $P < 0.05$ ; Yellow = highest percentage of recurrent cases. **B**, Representative Kaplan-Meier analysis of BRAF-like, RAI-treated THCA cohort stratified on high (Q3Q4) vs low (Q1Q2) tumoral expression of *AP2A2* and *RAB5C*; log-rank test. Number ( $n$ ) of patients per sub-group (high/low) and  $P$ -values are shown. **C**, RAI uptake of TPC-1-NIS and 8505C-NIS cells transfected with AAK1 versus scrambled (scr) siRNA. **D**, Relative NIS mRNA levels in TPC-1-NIS and 8505C-NIS cells transfected with siRNA specific for indicated AP2 genes and AAK1. **E** and **F**, RAI uptake of parental TPC-1 (E) and TPC-1-NIS (F) cells transfected with siRNA specific for indicated AP2 genes. Data presented as mean  $\pm$  S.E.M., one-way ANOVA followed by Dunnett's (E) or Dunnett's Tukey's (F) post hoc test (ns, not significant; \* $P < 0.05$ ; \*\*\* $P < 0.001$ ). (G) Immunofluorescence microscopy of 8505C-NIS cells (i-ii, HA-tagged NIS) transfected with AP2 $\alpha$ 1, AP2 $\mu$ 2 or scrambled siRNA as indicated. Confocal images represent NIS expression (red), HA expression (green) and a merged image (yellow). Arrows (white) highlight plasma membrane regions with greater NIS localisation. Scale bar – 20 mm. **H**, Same as (G) but in TPC-1-NIS cells. **I**, NanoBiT evaluation of protein: protein interaction between NIS and PBF in living HeLa cells transfected with AP2 $\sigma$ 2 siRNA. (bottom) Normalised NanoBiT assay results at 20 minutes

post-addition of Nano-Glo live cell assay substrate ( $n = 4$ ). **J**, Same as **I** but HEK293 cells transfected with AP2 $\alpha$ 1, AP2 $\alpha$ 2, AP2 $\mu$ 2 and AP2 $\sigma$ 2 siRNA ( $n = 3 - 4$ ).
