# Supplementary material for: Combined Vorinostat and Chloroquine Inhibit Sodium Iodide Symporter Endocytosis and Enhance Radionuclide Uptake In Vivo
Source: PubMed Central journal article supplement (PMC7615786; doi:10.1158/1078-0432.ccr-23-2043), 2024-04-01
Supplement: EMS190879-supplement-Supplementary_Figure_S5.pdf [file EMS190879-supplement-Supplementary_Figure_S5.pdf]

# SUPPLEMENTARY FIGURE S5

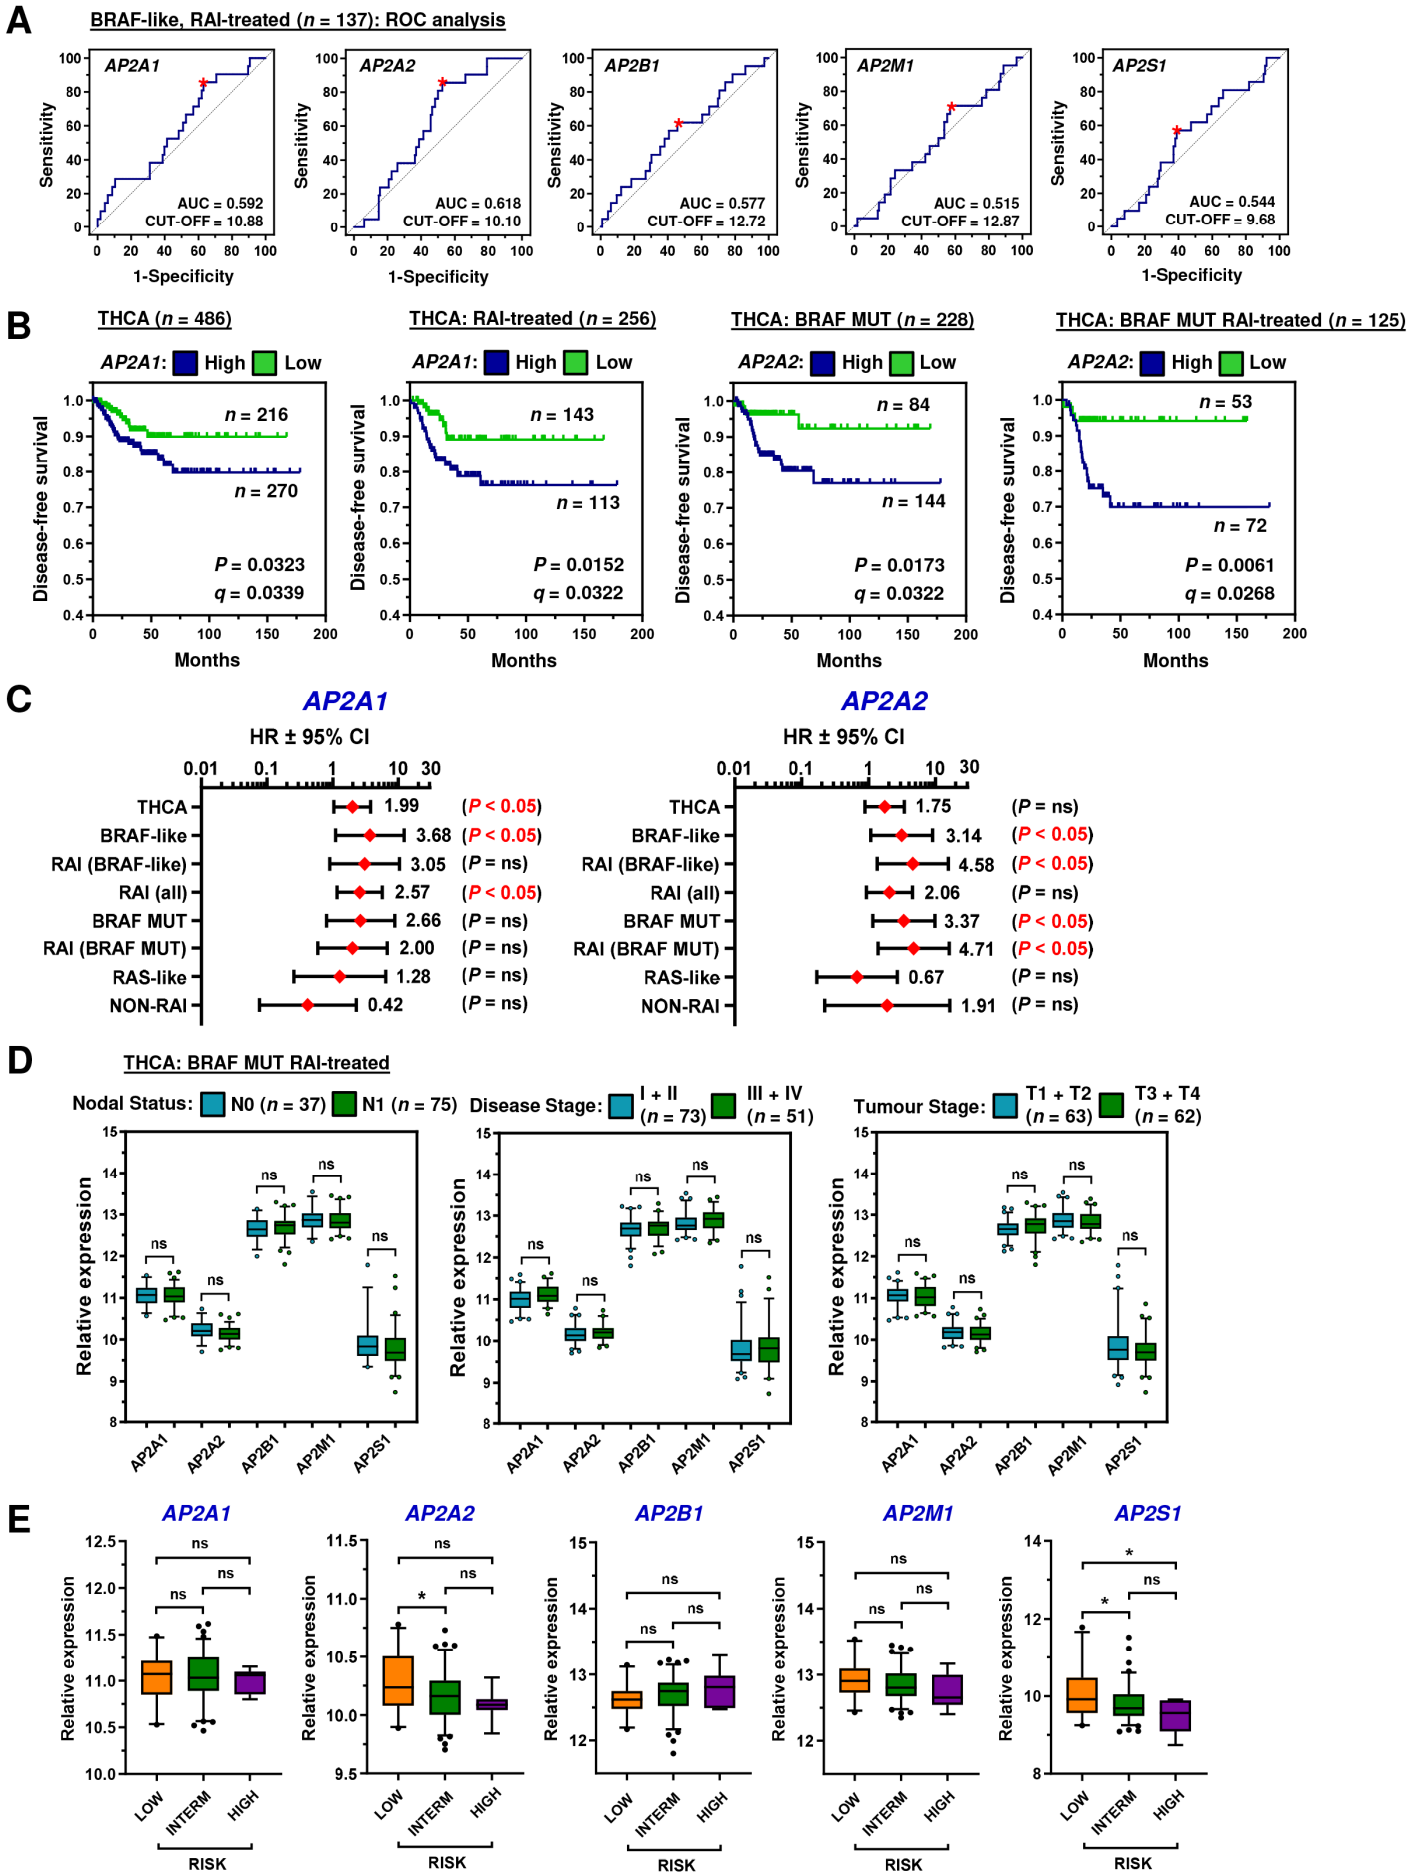

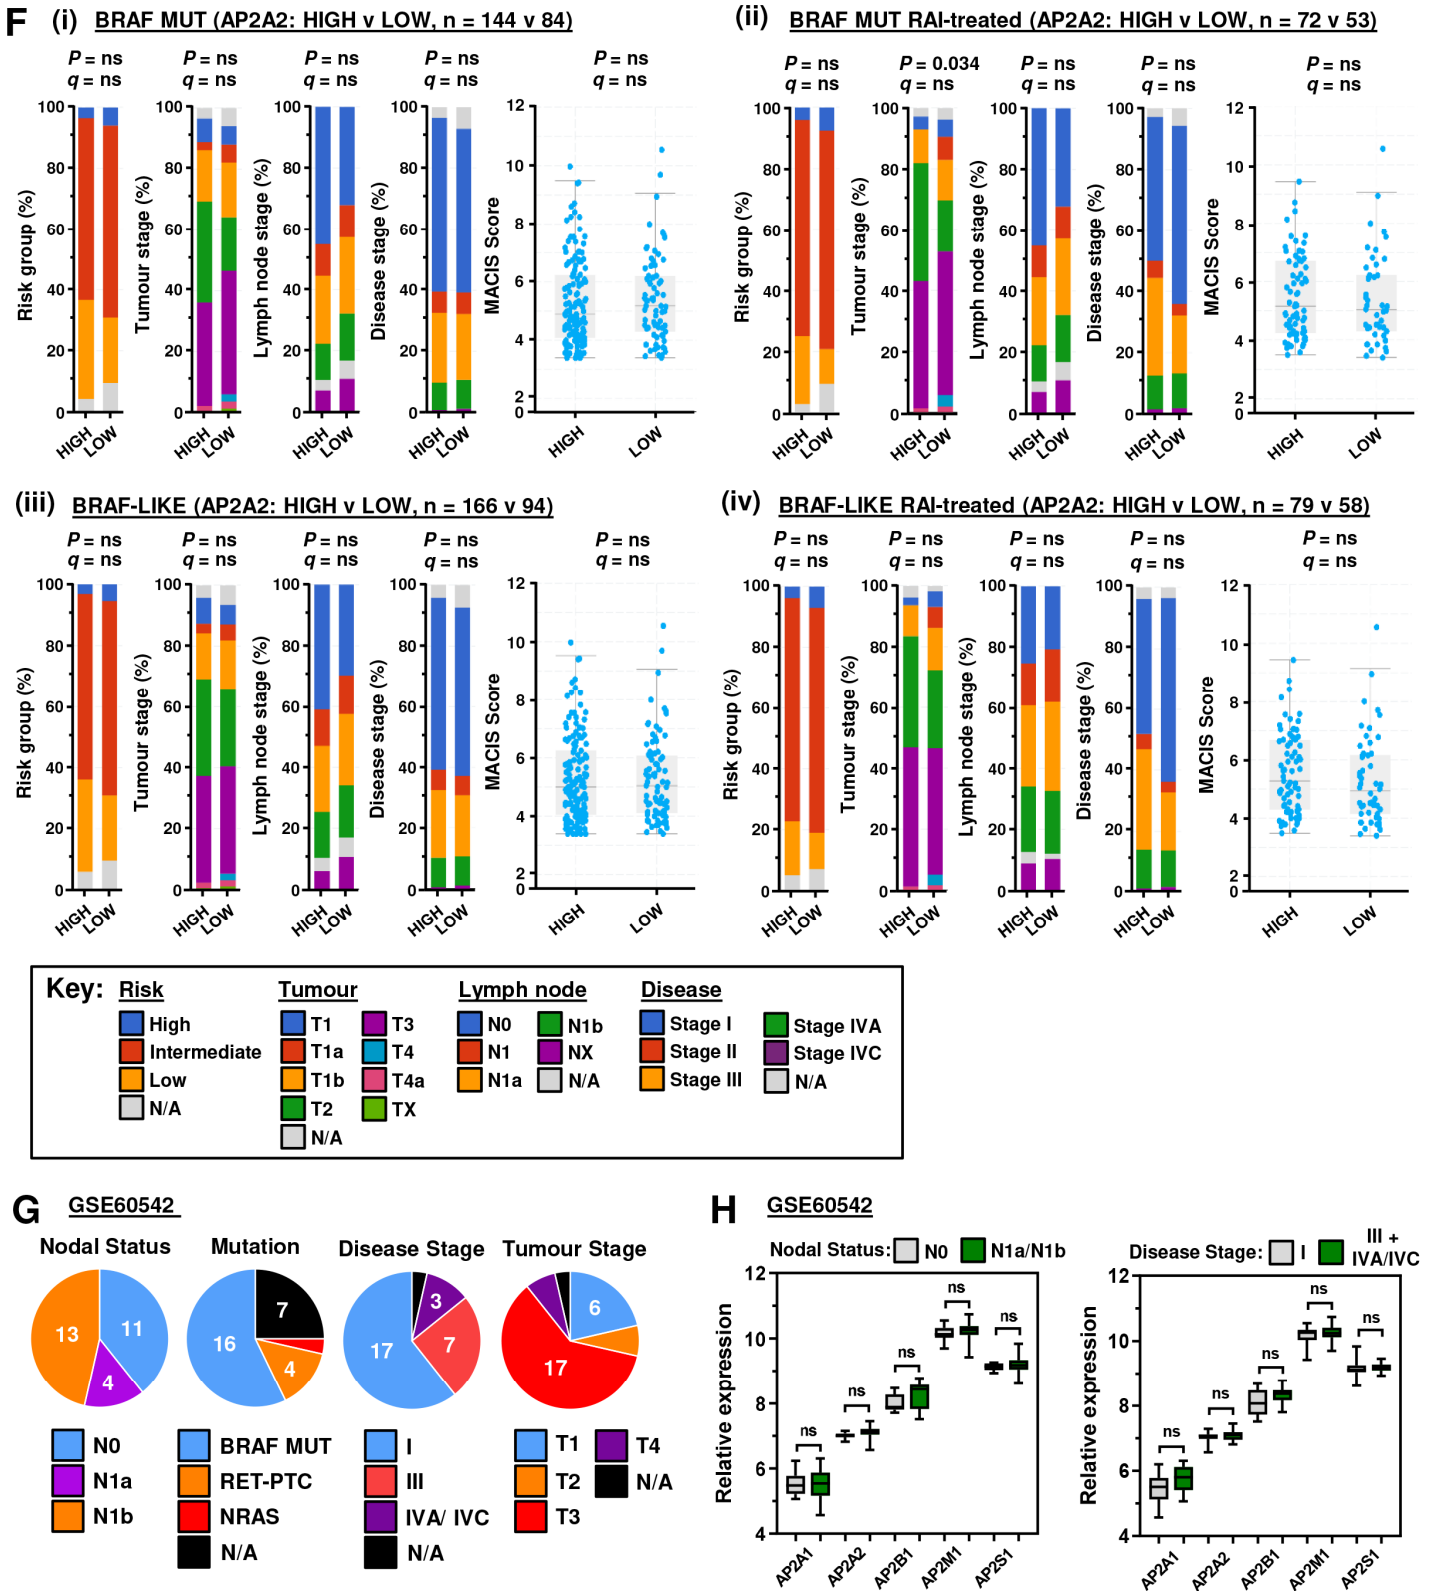

**Figure S5.** High AP2A1 and AP2A2 expression associated with increased risk of recurrence. **A**, Representative ROC curves of AP2 genes in the BRAF-like, RAI-treated THCA cohort ( $n = 137$ ). **B**, Representative Kaplan-Meier analysis of DFS for indicated THCA TCGA cohorts stratified on high versus low tumoral expression for either *AP2A1* or *AP2A2*; log-rank test. Number ( $n$ ) of patients per expression sub-group (high/low),  $P$ -values and  $q$ -values are shown. **C**, Hazard ratio (HR)  $\pm$  95% CI for patients stratified on AP2A1 and AP2A2 expression in THCA with the indicated treatment and genetic signature or alteration. **D**, Box and whisker plots showing expression ( $\log_2$ ) of indicated AP2 genes in the BRAF MUT, RAI-treated THCA cohort stratified on nodal status (*left*), disease stage (*middle*) and tumour stage (*right*);  $P$ -values determined by Mann-Whitney test and adjusted using the Benjamini-Hochberg FDR correction procedure (ns, not significant). **E**, Same as **D** but showing expression ( $\log_2$ ) of indicated AP2 genes in the BRAF MUT, RAI-treated THCA cohort stratified according to risk criteria [i.e. low, intermediate (INTERM) and high]. (ns, not significant;  $*P < 0.05$ ). **F**, Stacked bar charts showing clinical characteristics of THCA cohorts (i) BRAF MUT ( $n = 228$ ), (ii) BRAF

MUT RAI-treated ( $n = 125$ ), (iii) BRAF-like ( $n = 260$ ) and (iv) BRAF-like RAI-treated ( $n = 137$ ) stratified by AP2A2 expression (high versus low). Cut-off expression value used was 10.10. Clinical staging attributes include risk group, tumour staging, lymph node staging, disease staging and MACIS score. *P*-values derived using Chi-Squared test and adjusted using the Benjamini-Hochberg FDR correction procedure. **G**, Pie charts showing cancer staging and tumour mutational characteristics of patients in the GSE60542 cohort ( $n = 28$ ). **H**, Box and whisker plots showing expression ( $\log_2$ ) of indicated AP2 genes in the GSE60542 cohort stratified on nodal status (*left*) and disease stage (*right*); *P*-values determined by Mann-Whitney test and adjusted using the Benjamini-Hochberg FDR correction procedure (ns, not significant).
