# Supplementary material for: Combined Vorinostat and Chloroquine Inhibit Sodium Iodide Symporter Endocytosis and Enhance Radionuclide Uptake In Vivo
Source: PubMed Central journal article supplement (PMC7615786; doi:10.1158/1078-0432.ccr-23-2043), 2024-04-01
Supplement: EMS190879-supplement-Supplementary_Figure_S6.pdf [file EMS190879-supplement-Supplementary_Figure_S6.pdf]

# SUPPLEMENTARY FIGURE S6

## A BRAF-like ( $n = 260$ )

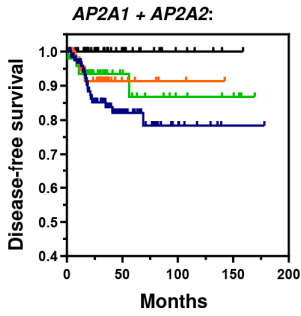

■ Low/ Low ( $n = 44$ )  
■ Low/ High ( $n = 40, P = NS$ )  
■ High/ Low ( $n = 50, P = NS$ )  
■ High/ High ( $n = 126, P = 0.0084$ )

## B THCA: BRAF-like RAI-treated ( $n = 137$ )

| Gene #1 | Gene #2 | Expression Group |           |           |           | Disease-Free Survival (L/L vs H/H) |       | Frequency of Recurrence (L/L vs H/H) |       |
|---------|---------|------------------|-----------|-----------|-----------|------------------------------------|-------|--------------------------------------|-------|
|         |         | Low/Low          |           | High/High |           | $P$                                | $q$   | $P$                                  | $q$   |
|         |         | $N_{tot}$        | $N_{rec}$ | $N_{tot}$ | $N_{rec}$ |                                    |       |                                      |       |
| AP2A1   | AP2A2   | 29               | 0         | 62        | 15        | 0.006                              | 0.038 | 0.002                                | 0.013 |
| AP2A1   | AP2B1   | 31               | 1         | 51        | 11        | 0.034                              | 0.071 | 0.026                                | 0.055 |
| AP2A1   | AP2M1   | 34               | 2         | 42        | 5         | 0.411                              | 0.432 | 0.450                                | 0.473 |
| AP2A1   | AP2S1   | 23               | 2         | 55        | 8         | 0.619                              | 0.557 | 0.714                                | 0.643 |
| AP2A2   | AP2B1   | 31               | 2         | 39        | 12        | 0.020                              | 0.063 | 0.015                                | 0.047 |
| AP2A2   | AP2M1   | 42               | 1         | 38        | 4         | 0.151                              | 0.238 | 0.185                                | 0.291 |
| AP2A2   | AP2S1   | 32               | 2         | 54        | 8         | 0.260                              | 0.328 | 0.310                                | 0.391 |

## C TCGA: Differential Expression - AP2A2 (High vs Low) $n = 859$ genes ( $q < 0.001$ ; Supp Fig. S6D)

Pathway Analysis (DAVID, TOPPgene)

$n = 72$  endocytic genes (Supp Fig. S6E and S6F)

14 NIS Interactors (Fig. 1A)

67 Endocytic accessory genes (Bhave *et al.*, PNAS 2020)

$n = 137$  unique genes (Fig. 3F,  $\log_2FC$  (C vs N))

Assess clinical relevance (Supp Fig. S7)

ROC analysis ( $AUC > 0.575$  or  $< 0.425$ )

Kaplan-Meier analysis

Univariate Cox regression analysis

Determine prognostic utility (Supp Fig. S8 and S9; Table 1)

Hierarchical cluster analysis

Risk score analysis

Multivariate Cox regression analysis

## D THCA: BRAF-like RAI-treated ( $n = 137$ )

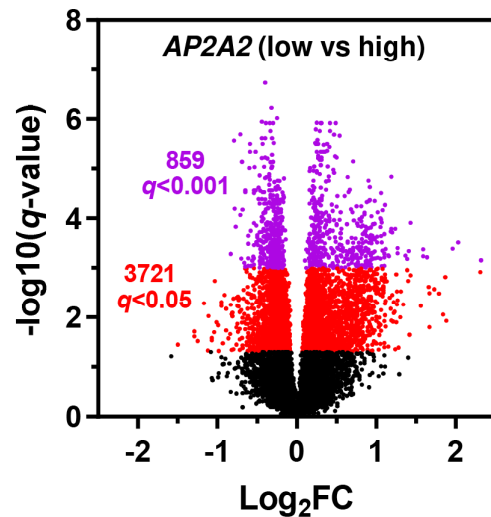

## E DAVID: KEGG\_PATHWAY

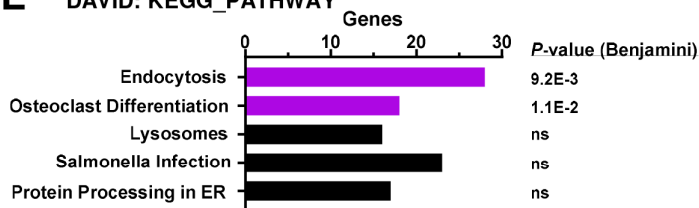

## DAVID: BIOLOGICAL PROCESS

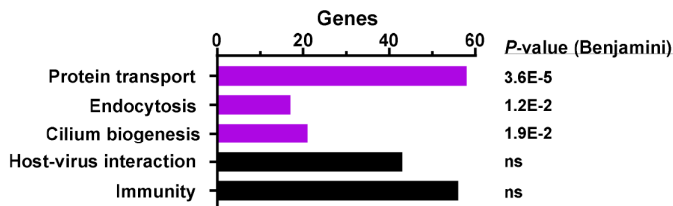

## F ToppGene: PATHWAY

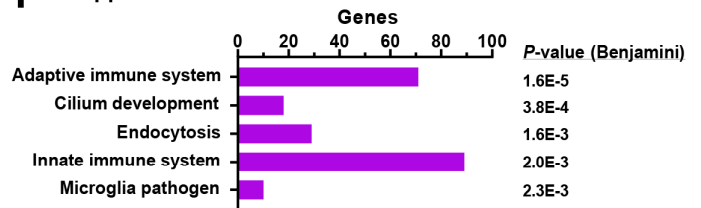

## ToppGene: GO BIOLOGICAL PROCESS

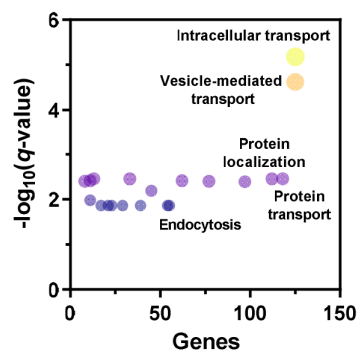

**Figure S6.** Identification of endocytic gene biomarkers for recurrence. **A**, Representative Kaplan-Meier analysis of DFS for the BRAF-like THCA cohort stratified on high vs low tumoral expression of *AP2A1* and *AP2A2*; log-rank test. Number (*n*) of patients per sub-group (high/low) and *P*-values are shown. **B**, Kaplan-Meier analysis of the BRAF-like, RAI-treated THCA cohort stratified on high (H/H) versus low (L/L) tumoral expression of either *AP2A1* or *AP2A2* combined with other AP2 genes; log-rank test. Number ( $N_{\text{tot}}$ ) of patients and recurrent cases ( $N_{\text{rec}}$ ) in each stratified group are shown, as well as *P*- and *q*-values. Fisher's exact test used to determine significance for incidence of recurrence between groups with high (H/H) vs low (L/L) tumoural gene expression. **C**, Bioinformatic pipeline used to filter and identify potential clinical biomarkers of PTC recurrence. **D**, Volcano plot comparing  $\log_2\text{FC}$  with *q*-value ( $-\log$  base 10) for the BRAF-like, RAI-treated THCA dataset [high vs low *AP2A2* expression;  $n = 137$ ]. Top 859 genes ( $q < 0.001$ ; purple spots) were filtered based on functional classification. **E**, DAVID functional classification of top 859 differentially expressed genes as described in **D**. KEGG pathway (*upper*) and biological process (*lower*) categories of greatest significance ( $P < 0.05$  or lower, purple bars; ns, not significant, black bars) and number of genes per category are indicated. **F**, Same as **E** but ToppGene used to classify the top 859 differentially expressed genes ( $q < 0.001$ ).
