# Supplementary material for: Combined Vorinostat and Chloroquine Inhibit Sodium Iodide Symporter Endocytosis and Enhance Radionuclide Uptake In Vivo
Source: PubMed Central journal article supplement (PMC7615786; doi:10.1158/1078-0432.ccr-23-2043), 2024-04-01
Supplement: EMS190879-supplement-Supplementary_Figure_S7.pdf [file EMS190879-supplement-Supplementary_Figure_S7.pdf]

# SUPPLEMENTARY FIGURE S7

## A THCA: BRAF-like RAI-treated ( $n = 137$ )

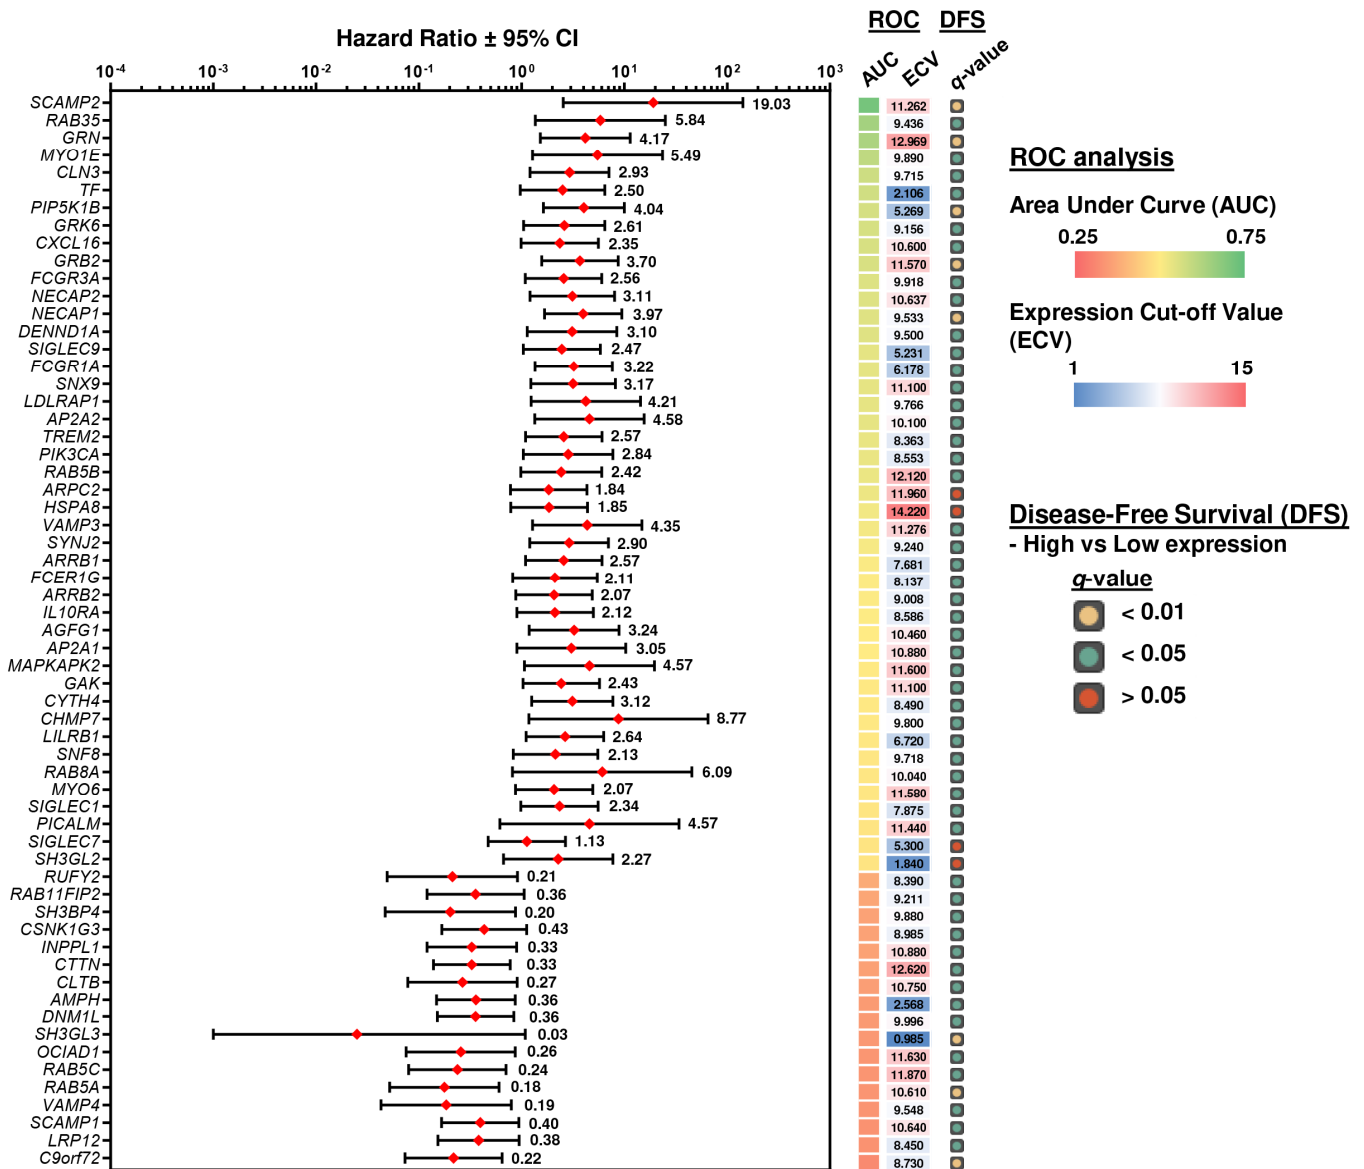

## B THCA: BRAF-like RAI-treated ( $n = 137$ )

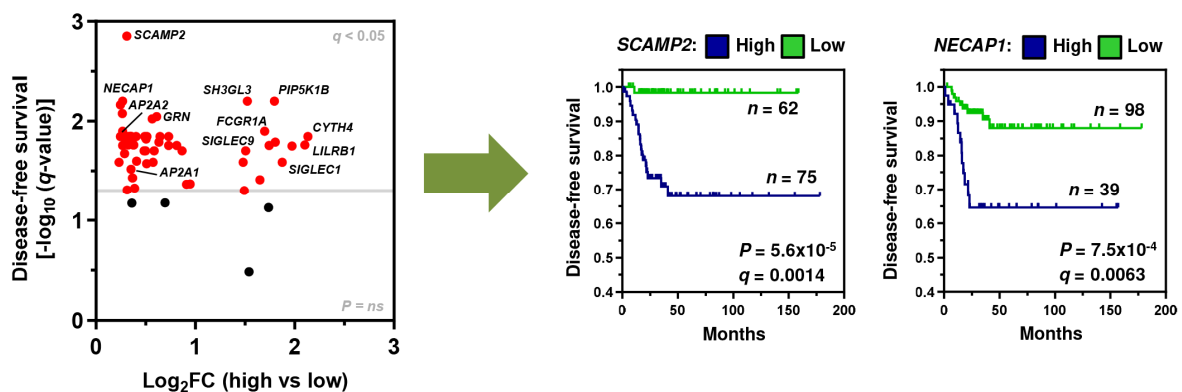

**Figure S7.** Comparison of the clinical relevance of filtered endocytic genes. **A**, Univariate Cox regression and ROC analysis of endocytic genes in BRAF-like, RAI treated THCA ( $n = 137$ ) with AUC  $> 0.575$  or  $< 0.425$  ( $n = 61$  out of 137 filtered endocytic genes fit this criteria). AUC, area under curve; ECV; expression cut-off value used for patient cohort stratification; DFS, disease-free survival; CI, confidence interval. **B**, Volcano plot illustrating log<sub>2</sub>FC in BRAF-like, RAI-treated THCA cohort (high vs low expression) compared to  $q$ -value ( $-\log$  base 10) of recurrence for 61 endocytic genes ( $q < 0.05$ ). (right) Representative Kaplan-Meier analysis of DFS for the BRAF-like, RAI treated THCA cohorts stratified on high vs low tumoural expression of *SCAMP2* and *NECAP1*; log-rank test. Number ( $n$ ) of patients per sub-group (high/low), as well as  $P$ - and  $q$ -values are shown.
