# Supplementary material for: Combined Vorinostat and Chloroquine Inhibit Sodium Iodide Symporter Endocytosis and Enhance Radionuclide Uptake In Vivo
Source: PubMed Central journal article supplement (PMC7615786; doi:10.1158/1078-0432.ccr-23-2043), 2024-04-01
Supplement: EMS190879-supplement-Supplementary_Figure_S8.pdf [file EMS190879-supplement-Supplementary_Figure_S8.pdf]

# SUPPLEMENTARY FIGURE S8

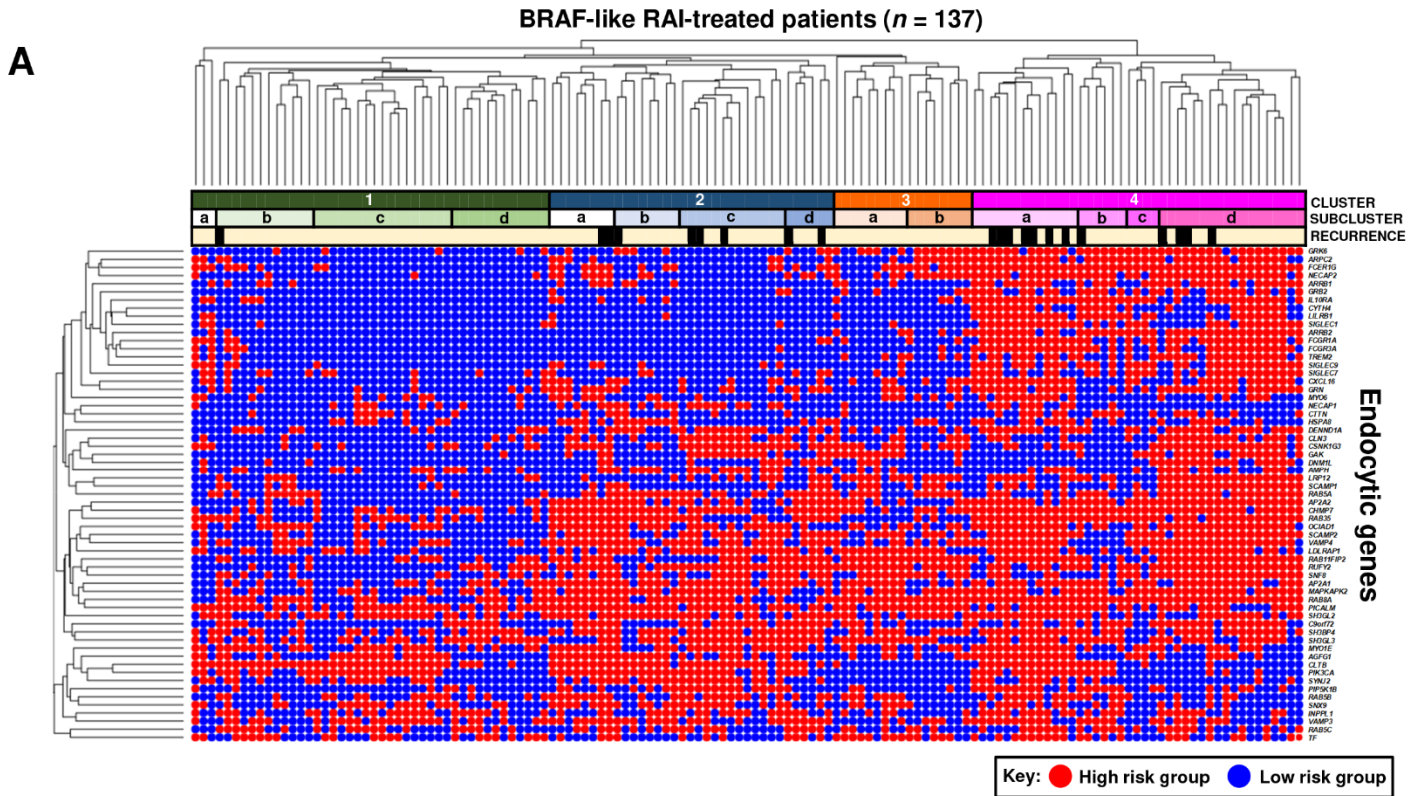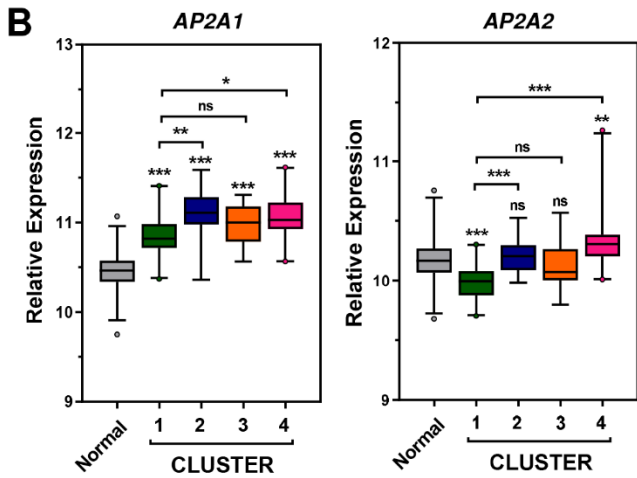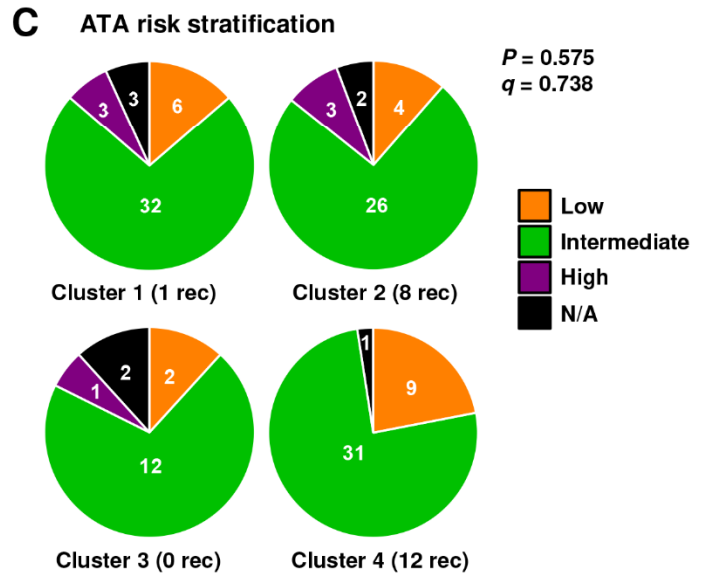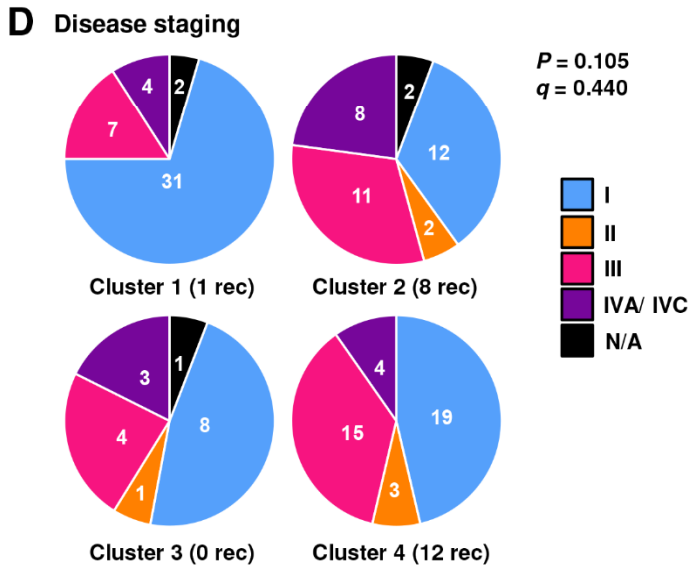

**Figure S8.** Greater endocytic gene dysregulation and higher AP2 $\alpha$  expression in recurrent PTC. **A**, Hierarchical cluster analysis of the BRAF-like, RAI-treated THCA cohort ( $n = 137$ ) based on endocytic genes ( $n = 61$ ) stratified into high and low risk expression groups. ROC analysis was used to determine optimal expression cut-off values for stratifying patients into high and low risk groups. Patients were divided into 4 major clusters (1 to 4) and 14 subclusters (1a to 4d). Patients with recurrent disease are indicated (black squares). **B**, Box and whisker plots showing expression ( $\log_2$ ) of *AP2A1* (left) and *AP2A2* (right) in the BRAF-like, RAI-treated THCA cohort stratified into patient clusters 1 to 4 vs normal. Data presented as mean  $\pm$  S.E.M., one-way ANOVA followed by Kruskal-Wallis test (ns, not significant; \* $P < 0.05$ ; \*\* $P < 0.01$ ; \*\*\* $P < 0.001$ ). **C**, Pie charts showing the ATA risk stratification characteristics of BRAF-like, RAI-treated patients subdivided into 4 clusters. Rec- number of recurrences. **D**, Same as **C** but showing disease staging characteristics as indicated. P-values derived using Chi-Squared test and adjusted using the Benjamini-Hochberg FDR correction procedure.
