# Supplementary material for: Combined Vorinostat and Chloroquine Inhibit Sodium Iodide Symporter Endocytosis and Enhance Radionuclide Uptake In Vivo
Source: PubMed Central journal article supplement (PMC7615786; doi:10.1158/1078-0432.ccr-23-2043), 2024-04-01
Supplement: EMS190879-supplement-Supplementary_Figure_S9.pdf [file EMS190879-supplement-Supplementary_Figure_S9.pdf]

# SUPPLEMENTARY FIGURE S9

## A THCA: BRAF-like RAI-treated ( $n = 137$ )

| Gene Classifier | Cut-Off value | Sensitivity% | Specificity% | ROC    |         | DFS     | HR     | 95% CI          |
|-----------------|---------------|--------------|--------------|--------|---------|---------|--------|-----------------|
|                 |               |              |              | AUC    | q-value |         |        |                 |
| 10              | 8.756         | 71.43        | 81.03        | 0.8206 | <0.0001 | <0.0001 | 9.131  | 3.527, 23.639   |
| 20              | 25.22         | 90.48        | 89.66        | 0.9179 | <0.0001 | <0.0001 | 52.782 | 12.187, 228.605 |
| 30              | 27.62         | 85.71        | 94.83        | 0.9319 | <0.0001 | <0.0001 | 57.265 | 16.489, 198.873 |
| 40              | 37.82         | 95.24        | 81.03        | 0.9397 | <0.0001 | <0.0001 | 61.305 | 8.212, 457.659  |

| Classifier | Genes                                                                            |
|------------|----------------------------------------------------------------------------------|
| 10         | RAB35, SCAMP2, GRK6, CXCL16, AP2A2, NECAP1, CTTN, INPPL1, AP2A1, RAB5B           |
| 20         | & CHMP7, CLTB, IL10RA, HSPA8, ARRB2, GRN, DENND1A, SYNJ2, FCGR1A, SH3GL3         |
| 30         | & FCGR3A, NECAP2, VAMP4, ARRB1, AGFG1, LILRB1, MYO6, OCIAD1, CYTH4, MYO1E        |
| 40         | & TREM2, SIGLEC9, SIGLEC1, ARPC2, FCER1G, GRB2, SH3GL2, PIP5K1B, PIK3CA, SIGLEC7 |

## B

| Gene Classifier | Validation datasets |                        |                      |                 |
|-----------------|---------------------|------------------------|----------------------|-----------------|
|                 | BRAF MUT<br>n = 228 | RAI-treated<br>n = 256 | BRAF-like<br>n = 260 | THCA<br>n = 486 |
|                 | AUC, q-value        | AUC, q-value           | AUC, q-value         | AUC, q-value    |
| 10              | 0.6845, 0.0023      | 0.6814, 0.0010         | 0.7229, 0.0003       | 0.5854, ns      |
| 20              | 0.7669, < 0.0001    | 0.7366, < 0.0001       | 0.8092, < 0.0001     | 0.6336, 0.0030  |
| 30              | 0.7664, < 0.0001    | 0.7447, < 0.0001       | 0.8144, < 0.0001     | 0.6421, 0.0020  |
| 40              | 0.7675, < 0.0001    | 0.7508, < 0.0001       | 0.8116, < 0.0001     | 0.6373, 0.0025  |

## C

| Patient Cohort         | $N_{tot}$ | $N_{rec}$ | 30 Endocytic Gene Classifier |                        |                         |                        | 40 Endocytic Gene Classifier |                        |                        |                       |
|------------------------|-----------|-----------|------------------------------|------------------------|-------------------------|------------------------|------------------------------|------------------------|------------------------|-----------------------|
|                        |           |           | DFS                          |                        | Univariate              |                        | DFS                          |                        | Univariate             |                       |
|                        |           |           | P-value                      | q-value                | HR (95% CI)             | P-value                | P-value                      | q-value                | HR (95% CI)            | P-value               |
| THCA                   | 486       | 46        | 4.14x10 <sup>-11</sup>       | 8.28x10 <sup>-11</sup> | 5.717 (3.187-10.257)    | 5.04x10 <sup>-9</sup>  | 8.99x10 <sup>-7</sup>        | 1.25x10 <sup>-6</sup>  | 3.861 (2.161-6.897)    | 5.05x10 <sup>-6</sup> |
| BRAF-like              | 260       | 26        | 6.91x10 <sup>-17</sup>       | 3.11x10 <sup>-16</sup> | 15.501 (6.604-36.383)   | 3.05x10 <sup>-10</sup> | 4.13x10 <sup>-10</sup>       | 7.43x10 <sup>-10</sup> | 10.631 (4.241-26.650)  | 4.63x10 <sup>-7</sup> |
| BRAF-like, RAI-treated | 137       | 21        | 6.10x10 <sup>-28</sup>       | 1.10x10 <sup>-26</sup> | 57.265 (16.489-198.873) | 1.86x10 <sup>-10</sup> | 1.03x10 <sup>-13</sup>       | 3.71x10 <sup>-13</sup> | 61.305 (8.212-457.659) | 5.99x10 <sup>-5</sup> |
| RAI-treated            | 256       | 34        | 2.01x10 <sup>-21</sup>       | 1.81x10 <sup>-20</sup> | 13.680 (6.798-27.530)   | 2.28x10 <sup>-13</sup> | 3.86x10 <sup>-12</sup>       | 9.93x10 <sup>-12</sup> | 8.421 (4.098-17.305)   | 6.69x10 <sup>-9</sup> |
| BRAF MUT               | 228       | 27        | 5.51x10 <sup>-13</sup>       | 1.65x10 <sup>-12</sup> | 10.953 (4.871-24.628)   | 7.06x10 <sup>-9</sup>  | 4.39x10 <sup>-8</sup>        | 6.59x10 <sup>-8</sup>  | 7.767 (3.270-18.452)   | 3.42x10 <sup>-6</sup> |
| BRAF MUT, RAI-treated  | 125       | 21        | 2.48x10 <sup>-20</sup>       | 1.49x10 <sup>-19</sup> | 38.250 (11.139-131.341) | 7.06x10 <sup>-9</sup>  | 8.75x10 <sup>-12</sup>       | 1.97x10 <sup>-11</sup> | 51.72 (6.930-385.975)  | 1.19x10 <sup>-4</sup> |
| RAS-like               | 115       | 8         | 0.504                        | 0.504                  | ns                      | 0.661                  | 0.376                        | 0.398                  | ns                     | 0.565                 |
| Non RAI-treated        | 167       | 6         | 0.262                        | 0.295                  | ns                      | 0.480                  | 0.146                        | 0.175                  | ns                     | 0.379                 |

## D 30 Endocytic Gene Classifier

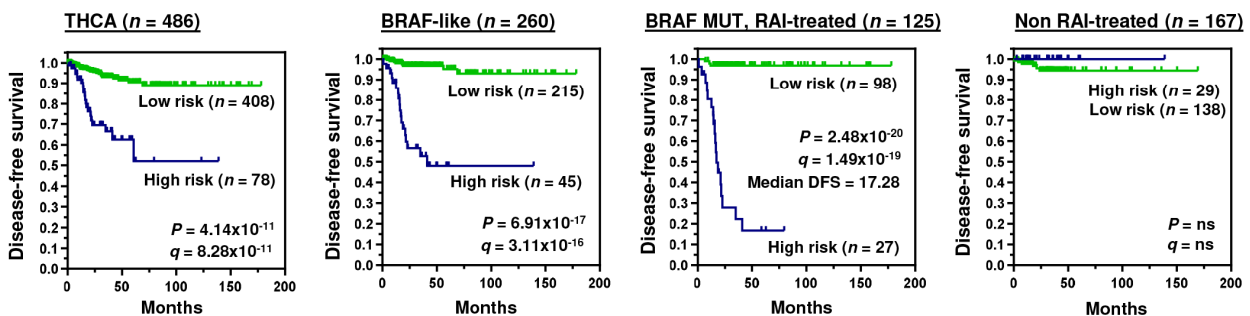

**Figure S9.** Construction and validation of endocytic multigene classifiers for PTC recurrence. **A**, Prognostic profile of endocytic risk score multigene classifiers ( $n = 10 - 40$  genes). Estimations of sensitivity and specificity (%) for the BRAF-like, RAI-treated THCA cohort ( $n = 137$ ) are given, as well as expression cut-off values for stratification. AUC, area under curve; DFS, disease-free survival; HR, hazard ratio; CI, confidence interval. (*lower*) Genes included in the various classifiers are indicated. Gene order based on consolidation of the 40 gene risk score, in which genes were ranked on the relative proportion of their contribution towards the overall risk score value. **B**, ROC analysis (AUC) of different gene classifiers ( $n = 10 - 40$ ) in validation larger THCA datasets as indicated. Red box indicates highest AUC value for each THCA cohort. **C**, Comparison of Kaplan-Meier and univariate Cox regression analysis in different THCA cohorts using either a 30- or 40 endocytic gene risk score classifier. Number of patients ( $N_{tot}$ ) and recurrent cases ( $N_{rec}$ ) in each patient cohort are given (ns, not significant). **D**, Representative Kaplan-Meier analysis of DFS for the THCA ( $n = 486$ ), BRAF-like ( $n = 260$ ), BRAF MUT RAI-treated ( $n = 125$ ) and Non RAI-treated ( $n = 167$ ) THCA cohorts stratified using the 30 endocytic gene classifier; log-rank test. Number ( $n$ ) of patients per sub-group (high/low), as well as  $P$ - and  $q$ -values are shown.
