# Supplementary material for: Combined Vorinostat and Chloroquine Inhibit Sodium Iodide Symporter Endocytosis and Enhance Radionuclide Uptake In Vivo
Source: PubMed Central journal article supplement (PMC7615786; doi:10.1158/1078-0432.ccr-23-2043), 2024-04-01
Supplement: EMS190879-supplement-Supplementary_Figure_S11.pdf [file EMS190879-supplement-Supplementary_Figure_S11.pdf]

**SUPPLEMENTARY FIGURE S11**

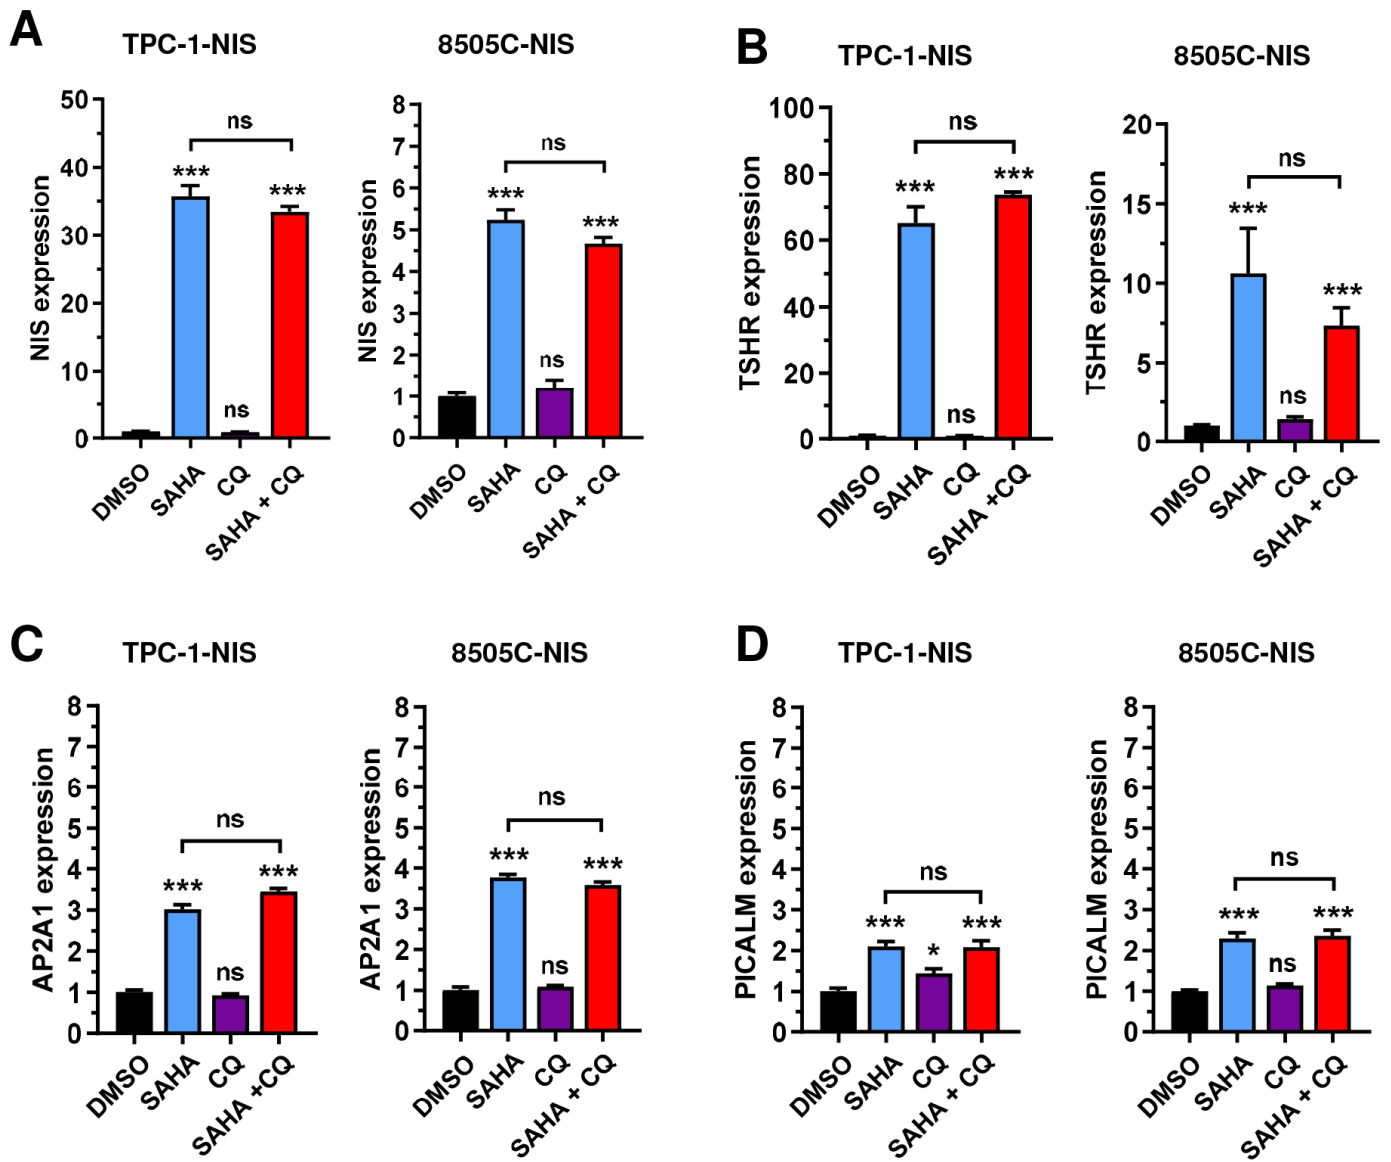

**Figure S11.** Transcriptional drug responses in thyroid cancer cells. **A-D**, Relative NIS (**A**), TSHR (**B**), AP2A1 (**C**) and PICALM (**D**) mRNA levels in TPC-1-NIS and 8505C-NIS cells treated with CQ and SAHA either alone or in combination. Data presented as mean  $\pm$  S.E.M., one-way ANOVA followed by Tukey's post hoc test (ns, not significant; \* $P < 0.05$ ; \*\*\* $P < 0.001$ ).
