# Supplementary material for: Combined Vorinostat and Chloroquine Inhibit Sodium Iodide Symporter Endocytosis and Enhance Radionuclide Uptake In Vivo
Source: PubMed Central journal article supplement (PMC7615786; doi:10.1158/1078-0432.ccr-23-2043), 2024-04-01
Supplement: EMS190879-supplement-Supplementary_Table_S2.pdf [file EMS190879-supplement-Supplementary_Table_S2.pdf]

## SUPPLEMENTARY TABLE S2

| Clinical Variable | BRAF MUT, RAI-treated (n = 112) |                                     |                             |                                      |                             | BRAF-like, RAI-treated (n = 124) |                                    |                             |                                      |                             |
|-------------------|---------------------------------|-------------------------------------|-----------------------------|--------------------------------------|-----------------------------|----------------------------------|------------------------------------|-----------------------------|--------------------------------------|-----------------------------|
|                   | n                               | Univariate<br>P-value, HR (95% CI), |                             | Multivariate<br>P-value, HR (95% CI) |                             | n                                | Univariate<br>P-value, HR (95% CI) |                             | Multivariate<br>P-value, HR (95% CI) |                             |
| <b>Age, years</b> |                                 |                                     |                             |                                      |                             |                                  |                                    |                             |                                      |                             |
| < 50              | 69                              |                                     |                             |                                      |                             | 79                               |                                    |                             |                                      |                             |
| > 50              | 43                              | 0.106                               | 2.103 (0.854-5.181)         | 0.372                                | 2.145 (0.401-11.46)         | 45                               | 0.072                              | 2.288 (0.929-5.634)         | 0.371                                | 2.304 (0.370-14.347)        |
| <b>Gender</b>     |                                 |                                     |                             |                                      |                             |                                  |                                    |                             |                                      |                             |
| Male              | 40                              |                                     |                             |                                      |                             | 39                               |                                    |                             |                                      |                             |
| Female            | 72                              | 0.741                               | 0.849 (0.322-2.237)         | 0.645                                | 0.784 (0.280-2.201)         | 90                               | 0.994                              | 0.996 (0.378-2.623)         | 0.807                                | 0.878 (0.308-2.498)         |
| <b>Stage</b>      |                                 |                                     |                             |                                      |                             |                                  |                                    |                             |                                      |                             |
| I + II            | 64                              |                                     |                             |                                      |                             | 70                               |                                    |                             |                                      |                             |
| III + IV          | 48                              | 0.099                               | 2.157 (0.867-5.367)         | 0.932                                | 1.078 (0.191-6.095)         | 54                               | 0.114                              | 2.085 (0.838-5.185)         | 0.968                                | 1.038 (0.167-6.438)         |
| <b>T stage</b>    |                                 |                                     |                             |                                      |                             |                                  |                                    |                             |                                      |                             |
| T1 + T2           | 56                              |                                     |                             |                                      |                             | 62                               |                                    |                             |                                      |                             |
| T3 + T4           | 56                              | 0.197                               | 1.848 (0.727-4.694)         | 0.218                                | 2.001 (0.663-6.037)         | 62                               | 0.222                              | 1.789 (0.704-4.544)         | 0.366                                | 1.621 (0.569-4.622)         |
| <b>Node stage</b> |                                 |                                     |                             |                                      |                             |                                  |                                    |                             |                                      |                             |
| N0                | 37                              |                                     |                             |                                      |                             | 34                               |                                    |                             |                                      |                             |
| N1                | 75                              | 0.228                               | 1.97 (0.654-5.939)          | 0.177                                | 2.258 (0.693-7.361)         | 90                               | 0.449                              | 1.531 (0.508-4.617)         | 0.371                                | 1.730 (0.521-5.748)         |
| <b>AP2A1</b>      |                                 |                                     |                             |                                      |                             |                                  |                                    |                             |                                      |                             |
| Low               | 27                              |                                     |                             |                                      |                             | 41                               |                                    |                             |                                      |                             |
| High              | 85                              | 0.392                               | 1.714 (0.499-5.882)         | 0.863                                | 0.884 (0.216-3.616)         | 83                               | 0.110                              | 2.733 (0.797-9.390)         | 0.479                                | 1.665 (0.406-6.819)         |
| <b>AP2A2</b>      |                                 |                                     |                             |                                      |                             |                                  |                                    |                             |                                      |                             |
| Low               | 47                              |                                     |                             |                                      |                             | 52                               |                                    |                             |                                      |                             |
| High              | 65                              | <b>0.022</b>                        | <b>4.220 (1.229-14.493)</b> | <b>0.009</b>                         | <b>6.310 (1.695-24.962)</b> | 72                               | <b>0.025</b>                       | <b>4.097 (1.193-14.066)</b> | <b>0.018</b>                         | <b>4.806 (1.303-17.731)</b> |
| <b>AP2B1</b>      |                                 |                                     |                             |                                      |                             |                                  |                                    |                             |                                      |                             |
| Low               | 57                              |                                     |                             |                                      |                             | 65                               |                                    |                             |                                      |                             |
| High              | 55                              | 0.230                               | 1.771 (0.697-4.498)         | 0.51                                 | 0.677 (0.212-2.163)         | 59                               | 0.167                              | 1.929 (0.759-4.902)         | 0.834                                | 0.889 (0.297-2.667)         |
| <b>AP2M1</b>      |                                 |                                     |                             |                                      |                             |                                  |                                    |                             |                                      |                             |
| Low               | 66                              |                                     |                             |                                      |                             | 75                               |                                    |                             |                                      |                             |
| High              | 46                              | 0.332                               | 0.619 (0.235-1.630)         | 0.66                                 | 0.760 (0.224-2.578)         | 49                               | 0.411                              | 0.666 (0.253-1.753)         | 0.559                                | 0.703 (0.215-2.296)         |
| <b>AP2S1</b>      |                                 |                                     |                             |                                      |                             |                                  |                                    |                             |                                      |                             |
| Low               | 46                              |                                     |                             |                                      |                             | 51                               |                                    |                             |                                      |                             |
| High              | 66                              | 0.087                               | 0.452 (0.182-1.123)         | 0.051                                | 0.295 (0.086-1.006)         | 73                               | 0.082                              | 0.445 (0.179-1.107)         | <b>0.044</b>                         | <b>0.295 (0.090-0.969)</b>  |

Multivariate analysis of AP2 genes in THCA. *n*, number; HR, hazard ratio; CI, confidence interval. *P*-values in bold were less than 0.05. Some patients in the BRAF MUT, RAI treated (*n* = 13) and BRAF-like, RAI-treated (*n* = 13) cohorts were not included in univariate and multivariate analysis due to missing clinical variables.
